# Supplementary material for: Prior Cervical Cancer Screening, Social Determinants of Health, and HIV Status Among Patients at the Cancer Disease Hospital, Zambia
Source: Research Square preprint supplement (doi:10.21203/rs.3.rs-10345811/v1), 2026-07-22
Supplement: Supplementary file 1 [file 9403697a15a0daa83c57627f.docx]

| **Supplemental Table 1. Social Determinants of Health by HIV Status (N = 464)** | | | | | | | |
| --- | --- | --- | --- | --- | --- | --- | --- |
| **Characteristica** | **Overall**  **N = 407** | | **HIV status** | | | | ***p*-value*** |
| **Negative**  **n = 186** | | **Positive**  **n = 221** | |
| **SDOH score**, median (IQR) | 5 (4-6) | | 5 (4-6) | | 5 (4-6) | | 0.103 |
| **SDOH score** |  |  |  |  |  |  | 0.030 |
| 0-4 | 286 | 61.6 | 74 | 39.8 | 112 | 60.2 |  |
| 5-10 | 178 | 38.4 | 139 | 50.0 | 139 | 50.0 |  |
| **Economic stability** |  |  |  |  |  |  |  |
| Do you have any source of income? |  |  |  |  |  |  | 0.752 |
| No | 141 | 30.5 | 63 | 44.7 | 78 | 55.3 |  |
| Yes | 322 | 69.5 | 149 | 46.3 | 173 | 53.7 |  |
| How hard is it for you to pay for the very basics—things like food, housing, and water? |  |  |  |  |  |  | 0.816 |
| Not hard at all | 45 | 9.8 | 20 | 44.4 | 25 | 55.6 |  |
| Somewhat hard/Very hard | 415 | 90.2 | 192 | 46.3 | 223 | 53.7 |  |
| **Education** |  |  |  |  |  |  |  |
| Level of education |  |  |  |  |  |  | 0.012 |
| None/Primary | 323 | 69.8 | 161 | 49.8 | 162 | 50.2 |  |
| Secondary/Tertiary | 140 | 30.2 | 52 | 37.1 | 88 | 62.9 |  |
| Knowledge of cervical cancer |  |  |  |  |  |  | <0.001 |
| No | 320 | 69.0 | 165 | 51.6 | 155 | 48.4 |  |
| Yes | 144 | 31.0 | 48 | 33.3 | 96 | 66.7 |  |
| **Health/Substance Use** |  |  |  |  |  |  |  |
| Do you consume alcohol? |  |  |  |  |  |  | 0.001 |
| No | 353 | 76.2 | 177 | 50.1 | 176 | 49.9 |  |
| Yes | 110 | 23.8 | 36 | 32.7 | 74 | 67.3 |  |
| Do you use tobacco? |  |  |  |  |  |  | 0.275 |
| No | 446 | 96.1 | 207 | 46.4 | 239 | 53.6 |  |
| Yes | 18 | 3.9 | 6 | 33.3 | 12 | 66.7 |  |
| **Neighborhood and built environment** |  |  |  |  |  |  |  |
| Rurality |  |  |  |  |  |  | <0.001 |
| Rural area (Village, Farm) | 224 | 48.4 | 122 | 54.5 | 102 | 45.5 |  |
| Urban area (Town) | 239 | 51.6 | 90 | 37.7 | 149 | 62.3 |  |
| Housing instability |  |  |  |  |  |  | 0.514 |
| No | 232 | 50.0 | 110 | 47.4 | 122 | 52.6 |  |
| Yes | 232 | 50.0 | 103 | 44.4 | 129 | 55.6 |  |
| **Social and Community Context** |  |  |  |  |  |  |  |
| Are you able to do your day-to-day activities on your own? |  |  |  |  |  |  | 0.478 |
| No | 125 | 26.9 | 54 | 43.2 | 71 | 56.8 |  |
| Yes | 339 | 73.1 | 159 | 46.9 | 180 | 53.1 |  |
| Do you ever feel lonely or isolated from those around you? |  |  |  |  |  |  | 0.960 |
| No | 128 | 27.6 | 59 | 46.1 | 69 | 53.9 |  |
| Yes | 336 | 72.4 | 154 | 45.8 | 182 | 54.2 |  |
| a Data are no. (%) unless otherwise indicated.  *p-values are based on the Wilcoxon rank-sum test for continuous variables and chi-squared test or Fisher exact test for categorical variables. *p* < 0.05 was considered statistically significant. | | | | | | | |
